# Supplementary material for: Threat history controls flexible escape behavior in mice
Source: PubMed Central journal article supplement (PMC9616793; doi:10.1016/j.cub.2022.05.022), 2022-07-11
Supplement: mmc1.pdf [file mmc1.pdf]

**Current Biology, Volume 32**

**Supplemental Information**

**Threat history controls flexible escape behavior in mice**

**Stephen C. Lenzi, Lee Cossell, Benjamin Grainger, Sarah F. Olesen, Tiago Branco, and Troy W. Margrie**

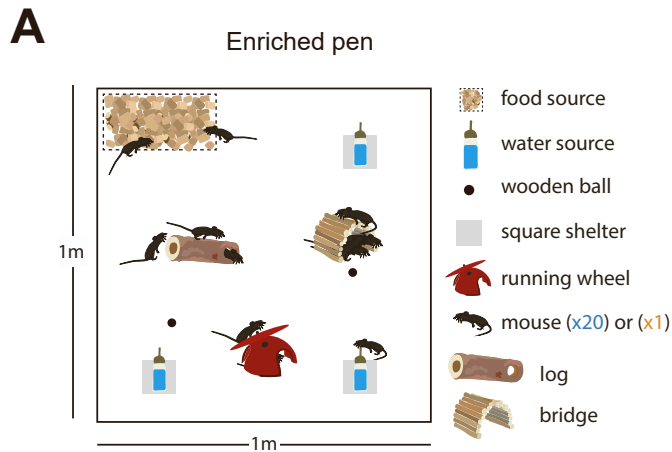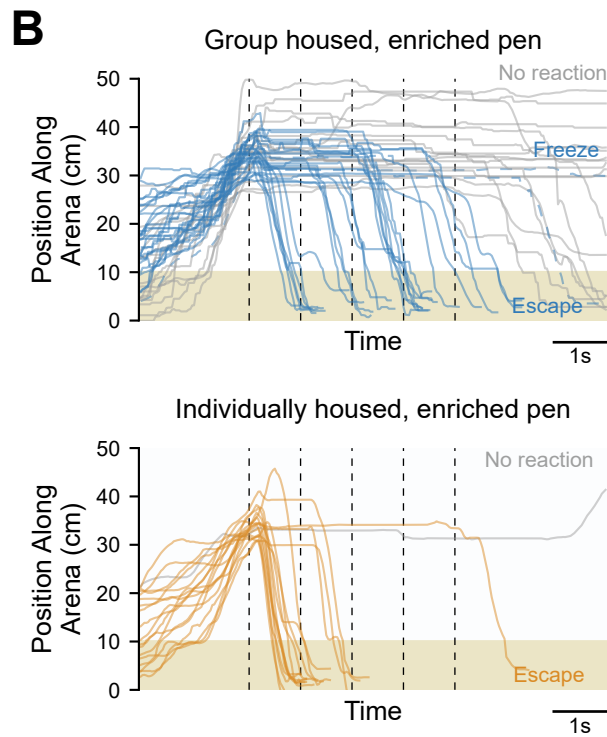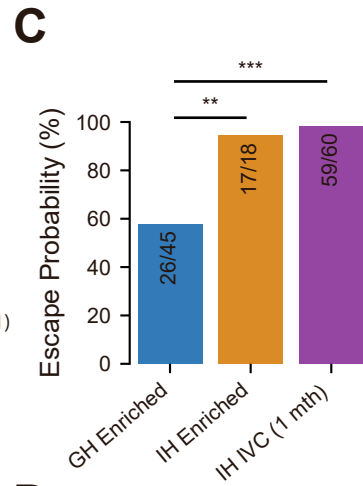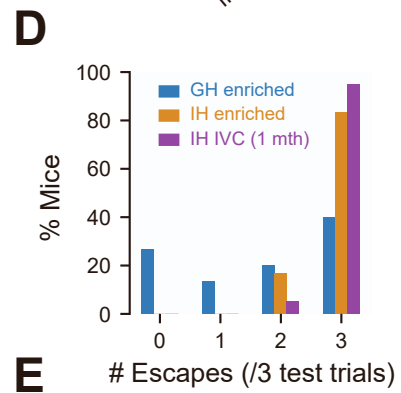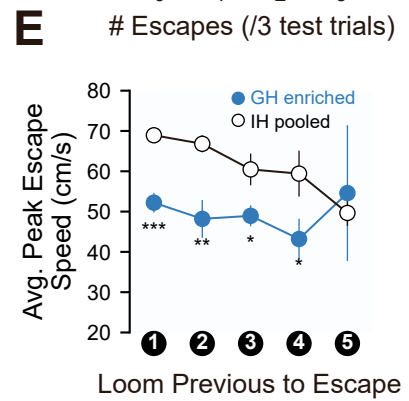

**Figure S1: Unreliable escape behaviour in group housed mice. Related to Figure 1.** **A)** Schematic illustrating the large environmentally enriched pen in which mice were either individually housed or housed as a group (n = 20) for at least 28 days before testing. **B)** Top: population data showing positional traces of all trials for all group housed mice (traces are classified as escape (solid line), freezing (dashed line) or no reaction (solid grey line)). Bottom: population data showing positional traces of all trials for all individually housed mice. **C)** Overall percentage of trials classified as escape according to housing condition. \*\* and \*\*\* indicate p-values of less than 0.01 and 0.001 respectively. **D)** Percentage of mice which escaped to 0, 1, 2 or 3 of the three test trials, shown for each experimental group. **E)** The mean peak speed for all escape trials grouped by the most recent looming spot preceding escape initiation for group housed and isolated mice (pooled with individually housed IVC conditions). \*, \*\* and \*\*\* indicate p-values of less than 0.05, 0.01 and 0.001 respectively. Error bars indicate standard error of the mean (SEM).

**A**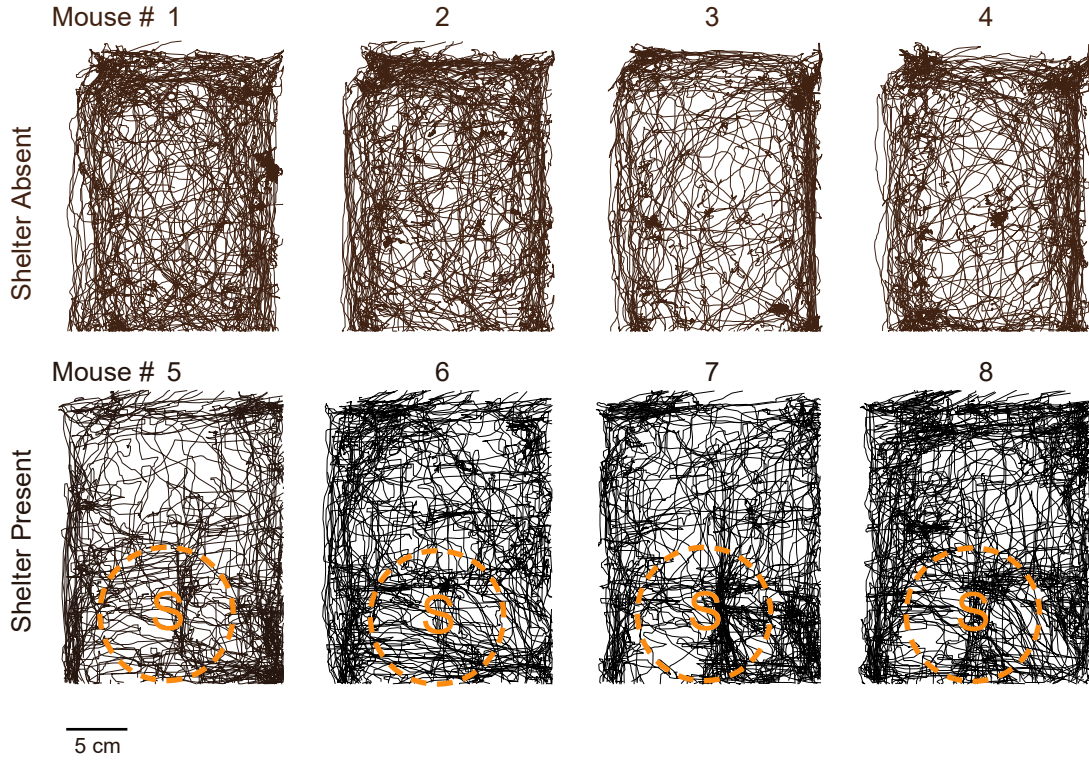**B**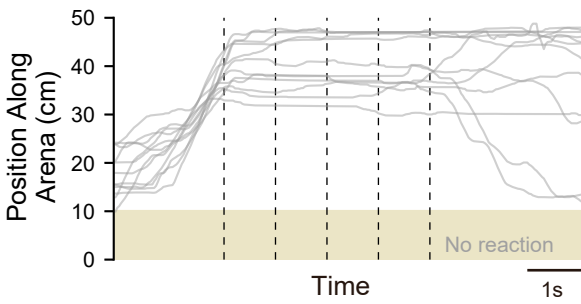**C**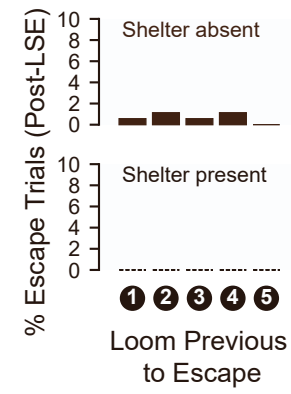**D**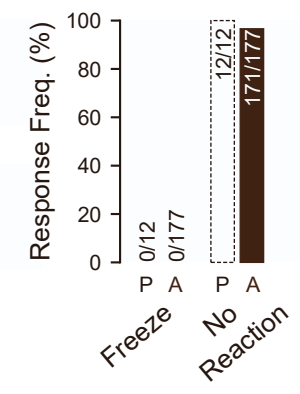

**Figure S2: Access to shelter during the LSE protocol does not influence its induction. Related to Figure 2. A)** Trajectory plots for four example mice during the LSE protocol when a shelter was absent (brown, top), or present (black, bottom). **B)** Positional traces for all trials from the four mice shown in **A)** (bottom) recorded during the post-LSE test trials. **C)** Bar graphs showing the percentage of trials classified as escape, grouped by most recent looming spot preceding escape initiation for each experimental group. **D)** The percentage of responses classified as freezing or as no-reaction for each experimental group.
